# Supplementary material for: The Role of Patient- and Treatment-Related Factors and Early Functional Imaging in Late Radiation-Induced Xerostomia in Oropharyngeal Cancer Patients
Source: MDPI journal article supplement (doi:10.3390/cancers13246296), 2021-12-15
Supplement: s1 [file s1]

## Materials and Method

### *DCE-MRI and DWI Quantification*

A commercial software (GenIQ General, GE Advanced Workstation, Palo Alto, CA) was used to extract the maps from the DCE-MRI data, based on a two-compartment pharmacokinetic model. The medians, percentiles, skewness, kurtosis, energy, and entropy values were calculated from the voxel-based distribution of perfusion parameters within the three central slices of the gland. In fact, DCE-MRI did not include the entire organ in some patients due to the limited volume coverage, which was primarily optimized in relation to the tumor location. The bin size used for each patient to extract the data was 0.05 min<sup>-1</sup>, 0.2 min<sup>-1</sup>, 0.02 and 0.05 for  $K^{trans}$ ,  $K_{ep}$ ,  $v_e$  and IAUGC, respectively.

The parotids at baseline and at the 10<sup>th</sup> fraction were outlined on DWI at  $b = 800$  s/mm<sup>2</sup> to extract the diffusion coefficients from the signal intensity curve at increasing  $b$  values, by means of home-made scripts developed in MATLAB (Release 2020b, MathWorks Inc., Natick, MA). To reduce the instability of the diffusion-weighted signal within single voxels and increase the robustness of ADC and  $D_t$  quantification, the median value derived from the entire gland was calculated for each  $b$  value and used for the fitting.

We decided not to include the fractional volume of capillary blood ( $f$ ) and the perfusion-related diffusion coefficient ( $D^*$ ) in the present study, as no clear evidence of the capability of IVIM-DWI in quantifying tissue vascularization have been documented to date [41].

### *Statistical tests and model building*

The relationships between categorical variables and the classification endpoint were estimated using the chi-squared test. The Kruskal–Wallis test was used to determine whether a given categorical variable had a statistically significant influence on a given continuous variable.

The Mann–Whitney U test was performed for the selection of the most significant continuous predictors for  $XER_{12}$ , using a cutoff  $p$  value of 0.10. In case of redundant variables or variables with a Spearman's correlation coefficient ( $\rho$ ) >0.8, the variable with the strongest association with  $XER_{12}$  was selected for the analysis.

A Decision Tree classification learner was applied to build the prediction models. The maximum number of split to control the depth of the tree was 20 and the Gini's diversity index was used as split criterion. The confidence interval for the area under the receiver operating characteristic curve (AUC) of each model was calculated with bias-corrected and accelerated percentile bootstrap method, using 1000 replicates. The model classification ability was also evaluated in terms of accuracy, sensitivity, specificity, positive predictive value (PPV), and negative predictive value (NPV) on the internal test set, after a stratified 5-fold cross-validation; this was done to correct for any optimism when evaluating the model's performance [24].

**Table S1.** DCE-MRI parameters sorted by RTOG classification.

|                          |                 | <b><math>XER_{12} &lt; \text{grade 2}</math></b> |            | <b><math>XER_{12} = \text{grade 2}</math></b> |            | <i>P value</i> * |
|--------------------------|-----------------|--------------------------------------------------|------------|-----------------------------------------------|------------|------------------|
|                          |                 | <i>Median</i>                                    | <i>IQR</i> | <i>Median</i>                                 | <i>IQR</i> |                  |
| <i>K<sup>trans</sup></i> | <i>Median</i>   | 0.42                                             | 0.36       | 0.34                                          | 0.21       | 0.094            |
|                          | <i>IQR</i>      | 0.15                                             | 0.14       | 0.13                                          | 0.14       | 0.347            |
|                          | <i>P10</i>      | 0.28                                             | 0.20       | 0.21                                          | 0.13       | <b>0.026</b>     |
|                          | <i>P25</i>      | 0.35                                             | 0.25       | 0.28                                          | 0.15       | 0.056            |
|                          | <i>P75</i>      | 0.50                                             | 0.44       | 0.44                                          | 0.31       | 0.134            |
|                          | <i>P90</i>      | 0.61                                             | 0.59       | 0.52                                          | 0.45       | 0.164            |
|                          | <i>Skewness</i> | 2.74                                             | 3.49       | 3.49                                          | 3.39       | 0.876            |

|                       |                 |       |       |       |       |              |
|-----------------------|-----------------|-------|-------|-------|-------|--------------|
|                       | <i>Kurtosis</i> | 20.46 | 36.20 | 22.84 | 54.15 | 0.915        |
|                       | <i>Mean</i>     | 0.45  | 0.41  | 0.38  | 0.30  | 0.126        |
|                       | <i>Std</i>      | 0.24  | 0.23  | 0.16  | 0.24  | 0.529        |
|                       | <i>Energy</i>   | 0.42  | 0.26  | 0.49  | 0.30  | 0.428        |
|                       | <i>Entropy</i>  | 1.58  | 1.06  | 1.36  | 1.15  | 0.355        |
| <i>K<sub>ep</sub></i> | <i>Median</i>   | 2.76  | 1.20  | 2.38  | 0.88  | 0.291        |
|                       | <i>IQR</i>      | 0.96  | 1.16  | 0.90  | 0.78  | 0.647        |
|                       | <i>P10</i>      | 1.68  | 0.96  | 1.42  | 0.56  | 0.259        |
|                       | <i>P25</i>      | 2.12  | 0.96  | 1.92  | 0.52  | 0.306        |
|                       | <i>P75</i>      | 3.36  | 1.68  | 2.80  | 1.21  | 0.427        |
|                       | <i>P90</i>      | 3.99  | 2.52  | 3.56  | 1.68  | 0.386        |
|                       | <i>Skewness</i> | 2.98  | 3.70  | 2.58  | 2.90  | 0.139        |
|                       | <i>Kurtosis</i> | 22.79 | 41.62 | 19.83 | 29.92 | 0.162        |
|                       | <i>Mean</i>     | 2.98  | 1.51  | 2.39  | 1.00  | 0.314        |
|                       | <i>Std</i>      | 1.34  | 1.08  | 0.82  | 1.12  | 0.457        |
|                       | <i>Energy</i>   | 0.36  | 0.25  | 0.38  | 0.19  | 0.689        |
|                       | <i>Entropy</i>  | 1.83  | 1.07  | 1.67  | 0.92  | 0.641        |
| <i>v<sub>e</sub></i>  | <i>Median</i>   | 0.17  | 0.10  | 0.15  | 0.06  | 0.055        |
|                       | <i>IQR</i>      | 0.05  | 0.03  | 0.05  | 0.02  | 0.193        |
|                       | <i>P10</i>      | 0.13  | 0.08  | 0.11  | 0.05  | 0.057        |
|                       | <i>P25</i>      | 0.15  | 0.08  | 0.13  | 0.05  | <b>0.049</b> |
|                       | <i>P75</i>      | 0.19  | 0.11  | 0.17  | 0.06  | 0.054        |
|                       | <i>P90</i>      | 0.22  | 0.14  | 0.20  | 0.09  | 0.100        |
|                       | <i>Skewness</i> | 1.31  | 1.58  | 1.83  | 3.34  | 0.256        |
|                       | <i>Kurtosis</i> | 8.29  | 8.78  | 11.89 | 28.50 | 0.193        |
|                       | <i>Mean</i>     | 0.18  | 0.10  | 0.15  | 0.06  | 0.061        |
|                       | <i>Std</i>      | 0.06  | 0.04  | 0.04  | 0.04  | 0.390        |
|                       | <i>Energy</i>   | 0.19  | 0.13  | 0.20  | 0.09  | 0.177        |
|                       | <i>Entropy</i>  | 2.79  | 1.04  | 2.73  | 0.69  | 0.249        |
| <i>IAUGC</i>          | <i>Median</i>   | 0.26  | 0.15  | 0.20  | 0.09  | <b>0.039</b> |
|                       | <i>IQR</i>      | 0.07  | 0.04  | 0.07  | 0.04  | 0.390        |
|                       | <i>P10</i>      | 0.18  | 0.11  | 0.15  | 0.07  | <b>0.030</b> |
|                       | <i>P25</i>      | 0.22  | 0.13  | 0.17  | 0.07  | <b>0.034</b> |
|                       | <i>P75</i>      | 0.29  | 0.17  | 0.25  | 0.11  | <b>0.049</b> |
|                       | <i>P90</i>      | 0.34  | 0.22  | 0.29  | 0.13  | 0.061        |
|                       | <i>Skewness</i> | 1.40  | 1.11  | 1.32  | 1.27  | 0.618        |
|                       | <i>Kurtosis</i> | 8.77  | 7.28  | 7.66  | 5.10  | 0.762        |
|                       | <i>Mean</i>     | 0.26  | 0.16  | 0.22  | 0.10  | <b>0.043</b> |
|                       | <i>Std</i>      | 0.07  | 0.05  | 0.06  | 0.04  | 0.291        |
|                       | <i>Energy</i>   | 0.21  | 0.14  | 0.23  | 0.12  | 0.540        |
|                       | <i>Entropy</i>  | 2.65  | 0.96  | 2.50  | 0.80  | 0.307        |

P values refer to Mann-Whitney test\*. Statistically significant p-values are **bold**.

**Table S2.** DWI parameters sorted by RTOG classification.

|                           | <b>XER<sub>12</sub> &lt; grade 2</b> |            | <b>XER<sub>12</sub> = grade 2</b> |            | <i>P value</i> |
|---------------------------|--------------------------------------|------------|-----------------------------------|------------|----------------|
|                           | <i>Median</i>                        | <i>IQR</i> | <i>Median</i>                     | <i>IQR</i> |                |
| <i>ADC</i>                | 1.25                                 | 0.17       | 1.24                              | 0.24       | 0.625          |
| <i>D<sub>t</sub></i>      | 0.94                                 | 0.17       | 0.97                              | 0.22       | 0.699          |
| <i>ADC<sub>10fr</sub></i> | 1.46                                 | 0.21       | 1.50                              | 0.25       | 0.128          |
| <i>D<sub>t,10fr</sub></i> | 1.08                                 | 0.22       | 1.10                              | 0.12       | 0.237          |
| <i>ADC(%)</i>             | 14.85                                | 17.67      | 15.48                             | 21.91      | 0.453          |

|                          |       |       |       |       |       |
|--------------------------|-------|-------|-------|-------|-------|
| <i>D<sub>t</sub></i> (%) | 15.00 | 22.41 | 16.31 | 21.18 | 0.756 |
|--------------------------|-------|-------|-------|-------|-------|

P values refer to Mann-Whitney test\*.

**Table S3.** Body mass index (BMI) and patient weight sorted by RTOG classification.

|                                               | XER <sub>12</sub> < grade 2 |            | XER <sub>12</sub> = grade 2 |            | <i>P value</i> |
|-----------------------------------------------|-----------------------------|------------|-----------------------------|------------|----------------|
|                                               | <i>Median</i>               | <i>IQR</i> | <i>Median</i>               | <i>IQR</i> |                |
| <b>BMI(Kg/m<sup>2</sup>)</b>                  | 24.30                       | 4.05       | 25.34                       | 4.46       | 0.218          |
| <b>BMI<sub>10fr</sub>(Kg/m<sup>2</sup>)</b>   | 23.72                       | 3.37       | 25.55                       | 5.41       | 0.144          |
| <b>BMI<sub>end RT</sub>(Kg/m<sup>2</sup>)</b> | 21.76                       | 5.60       | 22.69                       | 4.31       | 0.252          |
| <b>BMI<sub>10fr</sub>(%)</b>                  | -1.82                       | 4.17       | -1.44                       | 4.34       | 0.402          |
| <b>BMI<sub>10fr</sub>(Kg/m<sup>2</sup>)</b>   | -0.43                       | 1.08       | -0.33                       | 1.26       | 0.433          |
| <b>BMI<sub>end RT</sub>(%)</b>                | -10.53                      | 8.35       | -8.64                       | 9.89       | 0.485          |
| <b>BMI<sub>end RT</sub>(Kg/m<sup>2</sup>)</b> | -2.47                       | 2.27       | -2.30                       | 3.00       | 0.800          |
| <b>Weight(Kg)</b>                             | 74.00                       | 14.50      | 75.00                       | 17.25      | 0.971          |
| <b>Weight<sub>10fr</sub>(Kg)</b>              | 72.75                       | 14.50      | 74.75                       | 17.00      | 0.712          |
| <b>Weight<sub>end RT</sub>(Kg)</b>            | 66.00                       | 14.75      | 68.50                       | 16.38      | 0.802          |
| <b>Weight<sub>10fr</sub>(%)</b>               | -1.82                       | 4.17       | -1.46                       | 4.61       | 0.437          |
| <b>Weight<sub>10fr</sub></b>                  | -1.25                       | 3.50       | -1.00                       | 3.25       | 0.352          |
| <b>Weight<sub>end RT</sub>(%)</b>             | -10.47                      | 7.93       | -8.64                       | 9.01       | 0.671          |
| <b>Weight<sub>end RT</sub>(Kg)</b>            | -7.50                       | 7.00       | -7.00                       | 8.38       | 0.814          |

P values refer to Mann-Whitney test\*.

**Table S4** Volume of both glands. as single organ. sorted by RTOG classification.

|                                        | XER <sub>12</sub> < grade 2 |            | XER <sub>12</sub> = grade 2 |            | <i>P value</i> |
|----------------------------------------|-----------------------------|------------|-----------------------------|------------|----------------|
|                                        | <i>Median</i>               | <i>IQR</i> | <i>Median</i>               | <i>IQR</i> |                |
| Vol (cm <sup>3</sup> )                 | 65.3                        | 25.0       | 55.4                        | 28.3       | 0.168          |
| Vol <sub>10fr</sub> (cm <sup>3</sup> ) | 55.3                        | 21.5       | 45.7                        | 22.0       | 0.120          |
| Vol <sub>post</sub> (cm <sup>3</sup> ) | 39.4                        | 19.8       | 35.2                        | 15.9       | 0.155          |
| Vol <sub>10fr</sub> (%)                | 14.7                        | 12.4       | 16.5                        | 14.5       | 0.585          |
| Vol <sub>10fr</sub> (cm <sup>3</sup> ) | 8.6                         | 7.0        | 8.3                         | 7.7        | 0.896          |
| Vol <sub>post</sub> (%)                | 35.3                        | 21.1       | 26.1                        | 33.7       | 0.489          |
| Vol <sub>post</sub> (cm <sup>3</sup> ) | 19.2                        | 20.2       | 14.9                        | 21.0       | 0.155          |

P values refer to Mann-Whitney test\*.

**Table S5.** Quantitative parameters derived from Acute Xerostomia-related Questionnaire (XQ) scores sorted by RTOG classification.

|                       | XER <sub>12</sub> < grade 2 |            | XER <sub>12</sub> = grade 2 |            | <i>P value</i> |
|-----------------------|-----------------------------|------------|-----------------------------|------------|----------------|
|                       | <i>Median</i>               | <i>IQR</i> | <i>Median</i>               | <i>IQR</i> |                |
| XQ-Grad1              | 10.14                       | 6.06       | 13.0                        | 8.54       | 0.17           |
| XQ-Grad2              | 6.00                        | 4.51       | 6.71                        | 4.51       | 0.624          |
| XQ-Int <sub>mid</sub> | 51.5                        | 41.50      | 82.9                        | 78.4       | <b>0.023</b>   |

XQ-Grad1= gradient of the XQ score curve after one week of RT; XQ-Grad2 = gradient of the XQ score curve after four weeks of RT; XQ-Int<sub>mid</sub> = the integral of the XQ score curve from the start to mid treatment. Statistically significant p-values are **bold**.

**Table S6.** Dose-volume data of both glands. as single organ at baseline. sorted by RTOG classification.

|  | XER <sub>12</sub> < grade 2 |            | XER <sub>12</sub> = grade 2 |            | <i>P value</i> |
|--|-----------------------------|------------|-----------------------------|------------|----------------|
|  | <i>Median</i>               | <i>IQR</i> | <i>Median</i>               | <i>IQR</i> |                |

|                          |      |      |      |      |              |
|--------------------------|------|------|------|------|--------------|
| V20(%)                   | 75.9 | 19.2 | 80.2 | 16.2 | 0.177        |
| V25(%)                   | 63.9 | 17.2 | 69.2 | 15.3 | 0.089        |
| V30(%)                   | 54.4 | 12.1 | 62.2 | 15.1 | <b>0.038</b> |
| V35(%)                   | 46.8 | 15.5 | 57.3 | 15.5 | <b>0.015</b> |
| V40(%)                   | 40.9 | 14.8 | 50.8 | 16.1 | <b>0.015</b> |
| V45(%)                   | 34.9 | 11.4 | 45.0 | 17.0 | <b>0.016</b> |
| V50(%)                   | 28.3 | 10.0 | 36.8 | 19.4 | <b>0.013</b> |
| V55(%)                   | 21.4 | 8.9  | 28.2 | 20.7 | <b>0.008</b> |
| V60(%)                   | 13.0 | 10.7 | 18.4 | 16.5 | <b>0.001</b> |
| V65(%)                   | 6.5  | 8.6  | 10.1 | 12.3 | <b>0.000</b> |
| V70(%)                   | 1.0  | 2.3  | 3.4  | 3.9  | <b>0.000</b> |
| D <sub>mean</sub> (Gy)   | 35.8 | 6.0  | 41.0 | 7.8  | <b>0.005</b> |
| H-D <sub>mean</sub> (Gy) | 38.5 | 7.0  | 43.2 | 10.2 | <b>0.004</b> |

H-D<sub>mean</sub> is the highest mean dose between left and right parotid. Statistically significant p-values are **bold**.

**Table S7.** Dose-volume data of both glands, as single organ at 10<sup>th</sup> fraction, sorted by RTOG classification.

|                          | XER <sub>12</sub> < grade 2 |      | XER <sub>12</sub> = grade 2 |      | P value      |
|--------------------------|-----------------------------|------|-----------------------------|------|--------------|
|                          | Median                      | IQR  | Median                      | IQR  |              |
| V20(%)                   | 74.1                        | 19.1 | 79.2                        | 17.1 | 0.182        |
| V25(%)                   | 65.4                        | 18.6 | 69.2                        | 17.5 | 0.235        |
| V30(%)                   | 55.5                        | 14.5 | 63.3                        | 18.2 | 0.151        |
| V35(%)                   | 49.0                        | 17.7 | 55.3                        | 18.4 | 0.095        |
| V40(%)                   | 43.6                        | 17.3 | 49.4                        | 18.9 | 0.079        |
| V45(%)                   | 37.7                        | 15.6 | 44.9                        | 18.6 | 0.061        |
| V50(%)                   | 31.2                        | 12.8 | 35.7                        | 21.3 | 0.092        |
| V55(%)                   | 24.2                        | 11.0 | 28.0                        | 23.0 | 0.061        |
| V60(%)                   | 14.7                        | 8.5  | 18.5                        | 16.2 | <b>0.020</b> |
| V65(%)                   | 7.1                         | 10.6 | 10.9                        | 11.5 | <b>0.019</b> |
| V70(%)                   | 2.1                         | 4.2  | 4.3                         | 5.7  | <b>0.015</b> |
| D <sub>mean</sub> (Gy)   | 36.7                        | 8.2  | 39.9                        | 9.3  | <b>0.050</b> |
| H-D <sub>mean</sub> (Gy) | 38.8                        | 9.8  | 43.2                        | 10.5 | <b>0.039</b> |

H-D<sub>mean</sub> is the highest mean dose between left and right parotid. Statistically significant p-values are **bold**.

**Table S8.** Summary statistics of the diffusion parameters and their variations during treatment.

| Parameter*                                           | before RT   | at the 10 <sup>th</sup> | Variation from baseline (%) | P                 |
|------------------------------------------------------|-------------|-------------------------|-----------------------------|-------------------|
| ADC (10 <sup>-3</sup> mm <sup>2</sup> /s)            | 1.25 (0.17) | 1.46 (0.21)             | 14.9 (17.7)                 | <b>&lt;0.0001</b> |
| D <sub>t</sub> (10 <sup>-3</sup> mm <sup>2</sup> /s) | 0.94 (0.17) | 1.08 (0.22)             | 15.0 (22.4)                 | <b>&lt;0.0001</b> |

Data are reported as median(IQR). P values refer to Wilcoxon test. Statistically significant p-values are **bold**.

**Table S9.** Spearman's Rho values between ADC/D<sub>t</sub> variations and dose-volume data of both glands, as single organ at baseline.

| ADC(%)         |         | D <sub>t</sub> (%) |         |
|----------------|---------|--------------------|---------|
| Spearman's Rho | p-value | Spearman's Rho     | p-value |

|                          |       |              |        |              |
|--------------------------|-------|--------------|--------|--------------|
| V20(%)                   | 0.053 | 0.687        | -0.041 | 0.758        |
| V25(%)                   | 0.172 | 0.190        | 0.097  | 0.459        |
| V30(%)                   | 0.341 | 0.008        | 0.277  | <b>0.032</b> |
| V35(%)                   | 0.411 | <b>0.001</b> | 0.362  | <b>0.004</b> |
| V40(%)                   | 0.465 | <b>0.000</b> | 0.434  | <b>0.001</b> |
| V45(%)                   | 0.468 | <b>0.000</b> | 0.451  | <b>0.000</b> |
| V50(%)                   | 0.438 | <b>0.000</b> | 0.435  | <b>0.001</b> |
| V55(%)                   | 0.457 | <b>0.000</b> | 0.453  | <b>0.000</b> |
| V60(%)                   | 0.393 | <b>0.002</b> | 0.371  | <b>0.004</b> |
| V65(%)                   | 0.270 | <b>0.037</b> | 0.261  | <b>0.044</b> |
| V70(%)                   | 0.249 | 0.055        | 0.199  | 0.128        |
| D <sub>mean</sub> (Gy)   | 0.325 | <b>0.011</b> | 0.269  | <b>0.036</b> |
| H-D <sub>mean</sub> (Gy) | 0.300 | <b>0.019</b> | 0.314  | <b>0.014</b> |

H-D<sub>mean</sub> is the highest mean dose between left and right parotid.

**Table S10.** Spearman's Rho values between ADC/D<sub>t</sub> variations and dose-volume data of both glands at 10<sup>th</sup> fraction.

| Variable                        | ADC(%)         |              | D <sub>t</sub> (%) |              |
|---------------------------------|----------------|--------------|--------------------|--------------|
|                                 | Spearman's Rho | p-value      | Spearman's Rho     | p-value      |
| V20(%)                          | 0.041          | 0.762        | 0.004              | 0.976        |
| V25(%)                          | 0.169          | 0.214        | 0.132              | 0.331        |
| V30(%)                          | 0.317          | <b>0.017</b> | 0.289              | <b>0.031</b> |
| V35(%)                          | 0.362          | <b>0.006</b> | 0.353              | <b>0.008</b> |
| V40(%)                          | 0.378          | <b>0.004</b> | 0.378              | <b>0.004</b> |
| V45(%)                          | 0.381          | <b>0.004</b> | 0.409              | <b>0.002</b> |
| V50(%)                          | 0.369          | <b>0.005</b> | 0.417              | <b>0.001</b> |
| V55(%)                          | 0.397          | <b>0.002</b> | 0.430              | <b>0.001</b> |
| V60(%)                          | 0.295          | <b>0.028</b> | 0.347              | <b>0.009</b> |
| V65(%)                          | 0.191          | 0.159        | 0.244              | 0.070        |
| V70(%)                          | 0.124          | 0.363        | 0.139              | 0.308        |
| D <sub>mean</sub> (Gy)          | 0.372          | <b>0.003</b> | 0.370              | <b>0.004</b> |
| D <sub>mean, highest</sub> (Gy) | 0.349          | <b>0.006</b> | 0.400              | <b>0.002</b> |

Statistically significant p-values are **bold**.

**Table S11.** Selected (categorical) predictor for Xerostomia Grade  $\geq 2$  12 months after radiotherapy.

| N stage | XER <sub>12</sub> < 2 | XER <sub>12</sub> = 2 | P-value (Chi-squared) |
|---------|-----------------------|-----------------------|-----------------------|
| N0      | 6                     | 1                     | 0.034                 |
| N1      | 17                    | 3                     |                       |
| N2      | 14                    | 15                    |                       |
| N3      | 5                     | 2                     |                       |

**Table S12.** Spearman's coefficient Rho between selected (continuous) variables.

|                              | <i>K<sup>trans</sup></i> P10 | <i>v<sub>e</sub></i> P25 | V65(%) | <i>D<sub>mean</sub></i> | <i>D<sub>mean,SMG</sub></i> | XQ-Int <sub>mid</sub> |
|------------------------------|------------------------------|--------------------------|--------|-------------------------|-----------------------------|-----------------------|
| <i>K<sup>trans</sup></i> P10 | 1.00                         |                          |        |                         |                             |                       |
| <i>v<sub>e</sub></i> P25     | 0.62                         | 1.00                     |        |                         |                             |                       |
| V65                          | -0.25                        | -0.13                    | 1.00   |                         |                             |                       |
| <i>D<sub>mean</sub></i>      | -0.19                        | 0.03                     | 0.68   | 1.00                    |                             |                       |

|                |       |       |      |      |      |      |
|----------------|-------|-------|------|------|------|------|
| $D_{mean,SMG}$ | -0.31 | -0.34 | 0.39 | 0.24 | 1.00 |      |
| $XQ-Int_{mid}$ | -0.05 | -0.08 | 0.33 | 0.32 | 0.32 | 1.00 |

**Table S13.** Comparison between prediction accuracies of the models. P-values refer to the mid-p-value McNemar test.

|    | Models based on variables at baseline |             |             |      |             |             |      | Models based on variables at baseline and during RT |             |             |      |             |             |             |      |             |
|----|---------------------------------------|-------------|-------------|------|-------------|-------------|------|-----------------------------------------------------|-------------|-------------|------|-------------|-------------|-------------|------|-------------|
|    | 1                                     | 2           | 3           | 4    | 5           | 6           | 7    | 8                                                   | 9           | 10          | 11   | 12          | 13          | 14          | 15   | 16          |
| 1  | 1.00                                  | 0.30        | 0.06        | 0.73 | 0.86        | 0.63        | 0.61 | 0.09                                                | 0.50        | 0.05        | 0.51 | <b>0.02</b> | 0.09        | 0.47        | 0.56 | 0.34        |
| 2  | 0.30                                  | 1.00        | <b>0.01</b> | 0.12 | 0.41        | 0.60        | 0.12 | <b>0.00</b>                                         | 0.75        | <b>0.01</b> | 0.09 | <b>0.00</b> | <b>0.01</b> | 0.71        | 0.09 | <b>0.04</b> |
| 3  | 0.06                                  | <b>0.01</b> | 1.00        | 0.10 | <b>0.04</b> | <b>0.04</b> | 0.21 | 0.86                                                | 0.05        | 1.00        | 0.38 | 0.79        | 1.00        | <b>0.03</b> | 0.21 | 0.36        |
| 4  | 0.73                                  | 0.12        | 0.10        | 1.00 | 0.61        | 0.34        | 0.86 | 0.15                                                | 0.36        | 0.18        | 0.71 | 0.08        | 0.20        | 0.31        | 0.85 | 0.56        |
| 5  | 0.86                                  | 0.41        | <b>0.04</b> | 0.61 | 1.00        | 0.72        | 0.30 | 0.07                                                | 0.67        | 0.06        | 0.41 | <b>0.04</b> | 0.05        | 0.61        | 0.46 | 0.23        |
| 6  | 0.63                                  | 0.60        | <b>0.04</b> | 0.34 | 0.72        | 1.00        | 0.26 | <b>0.02</b>                                         | 0.88        | 0.05        | 0.27 | <b>0.03</b> | <b>0.04</b> | 0.87        | 0.32 | 0.18        |
| 7  | 0.61                                  | 0.12        | 0.21        | 0.86 | 0.30        | 0.26        | 1.00 | 0.24                                                | 0.31        | 0.26        | 0.86 | 0.17        | 0.19        | 0.22        | 1.00 | 0.63        |
| 8  | 0.09                                  | <b>0.00</b> | 0.86        | 0.15 | 0.07        | <b>0.02</b> | 0.24 | 1.00                                                | <b>0.00</b> | 0.82        | 0.12 | 1.00        | 0.84        | <b>0.01</b> | 0.17 | 0.34        |
| 9  | 0.50                                  | 0.75        | 0.05        | 0.36 | 0.67        | 0.88        | 0.31 | <b>0.00</b>                                         | 1.00        | <b>0.02</b> | 0.11 | <b>0.01</b> | <b>0.02</b> | 1.00        | 0.24 | 0.13        |
| 10 | 0.05                                  | <b>0.01</b> | 1.00        | 0.18 | 0.06        | 0.05        | 0.26 | 0.82                                                | <b>0.02</b> | 1.00        | 0.29 | 0.75        | 1.00        | <b>0.01</b> | 0.09 | 0.30        |
| 11 | 0.51                                  | 0.09        | 0.38        | 0.71 | 0.41        | 0.27        | 0.86 | 0.12                                                | 0.11        | 0.29        | 1.00 | 0.23        | 0.33        | 0.15        | 0.83 | 0.84        |
| 12 | <b>0.02</b>                           | <b>0.00</b> | 0.79        | 0.08 | <b>0.04</b> | <b>0.03</b> | 0.17 | 1.00                                                | 0.01        | 0.75        | 0.23 | 1.00        | 0.80        | <b>0.01</b> | 0.10 | 0.18        |
| 13 | 0.09                                  | <b>0.01</b> | 1.00        | 0.20 | 0.05        | <b>0.04</b> | 0.19 | 0.84                                                | <b>0.02</b> | 1.00        | 0.33 | 0.80        | 1.00        | <b>0.02</b> | 0.23 | 0.33        |
| 14 | 0.47                                  | 0.71        | <b>0.03</b> | 0.31 | 0.61        | 0.87        | 0.22 | <b>0.01</b>                                         | 1.00        | <b>0.01</b> | 0.15 | <b>0.01</b> | <b>0.02</b> | 1.00        | 0.22 | 0.09        |
| 15 | 0.56                                  | 0.09        | 0.21        | 0.85 | 0.46        | 0.32        | 1.00 | 0.17                                                | 0.24        | 0.09        | 0.83 | 0.10        | 0.23        | 0.22        | 1.00 | 0.63        |
| 16 | 0.34                                  | <b>0.04</b> | 0.36        | 0.56 | 0.23        | 0.18        | 0.63 | 0.34                                                | 0.13        | 0.30        | 0.84 | 0.18        | 0.33        | 0.09        | 0.63 | 1.00        |

Statistically significant p-values are **bold**.

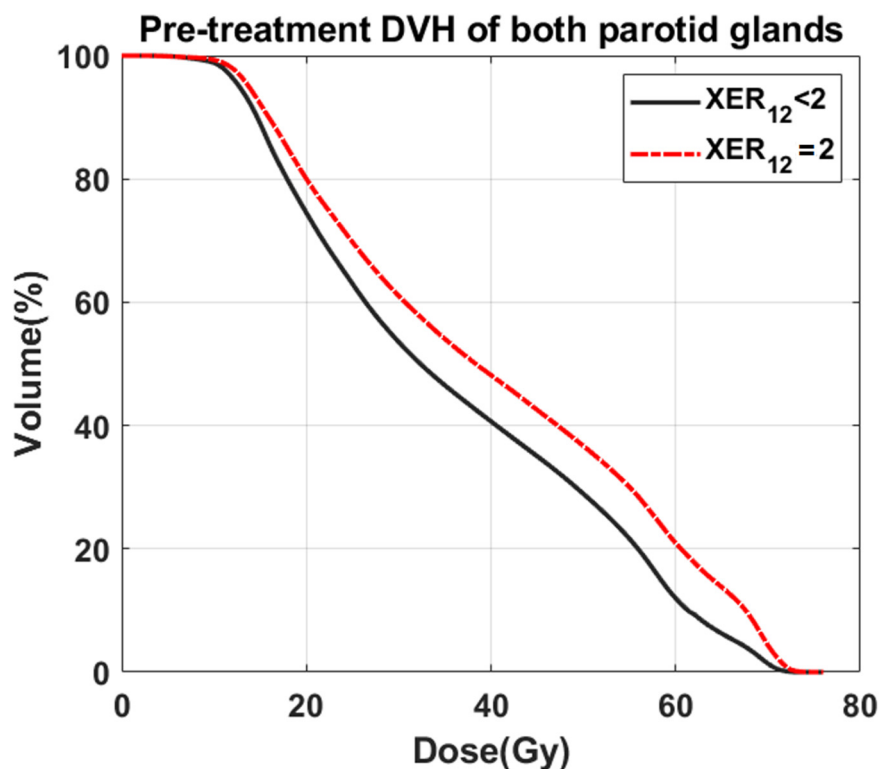

**Figure S1.** The average of the distribution of cumulative dose–volume histograms (DVHs) of both parotids, for patients with salivary gland toxicity at 12 months after radiotherapy ( $XER_{12} < \text{grade } 2$  (solid line) and  $= \text{grade } 2$  (dashed line)).

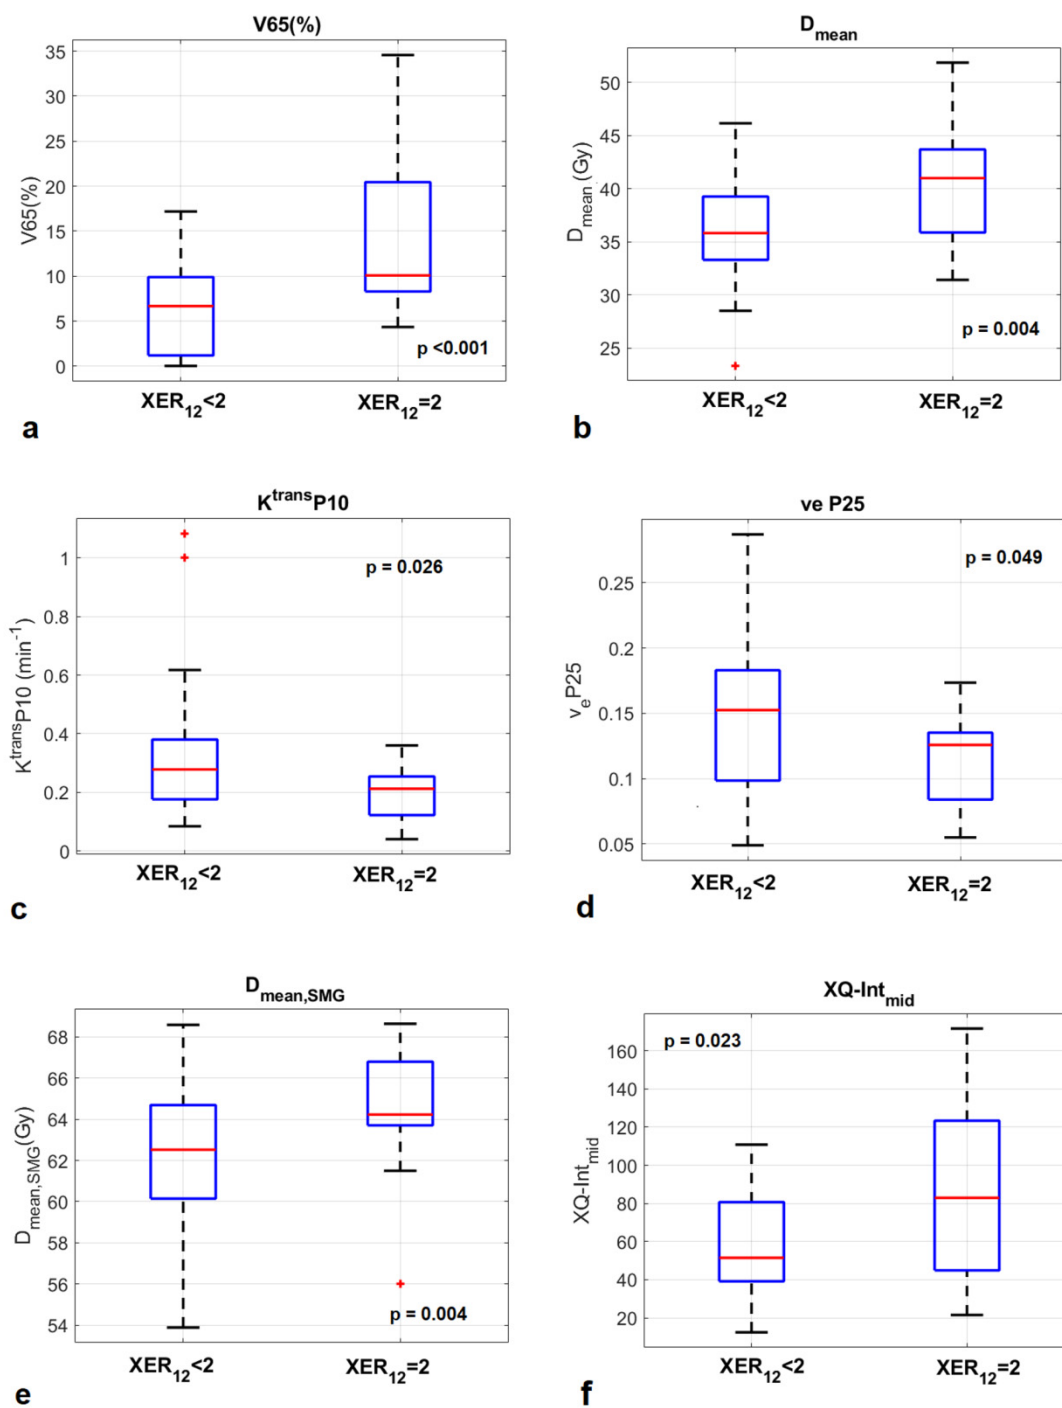

**Figure S2.** Box-and-whisker plots of the most significant predictors for  $XER_{12}$  = grade 2. P values for the Mann-Whitney test are reported in each plot.

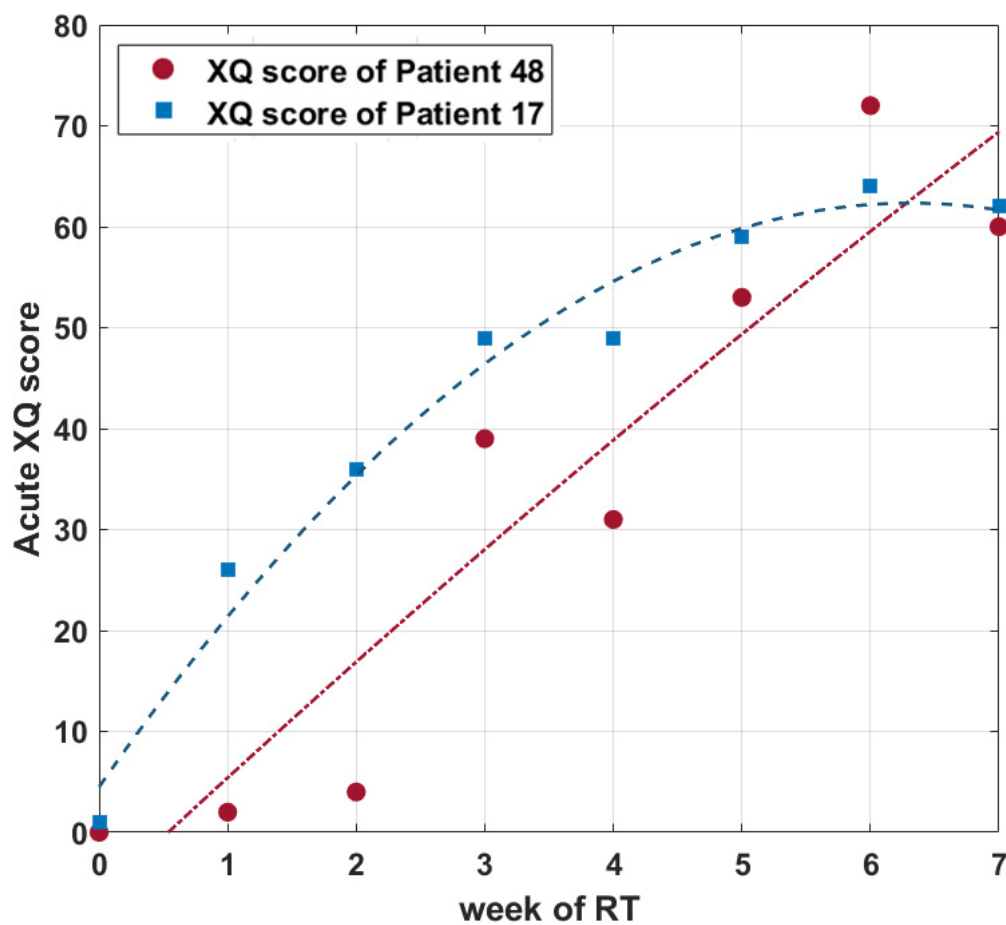

**Figure S3. Plots of acute XQ-score versus week of RT in two representative patients.** Patient 48, who developed grade 1 XER<sub>12</sub> showed a lower curve of acute XQ scores versus treatment weeks than Patient 17, who experienced grade 2 XER<sub>12</sub> (XQ-Int<sub>mid</sub> = 33.2 versus 82.9, XQ-Grad1 = 11.6 versus 15.4 and XQ-Grad2 = 10.7 versus 6.7, respectively). These data refer to the same patients showed in Figure 2 of the manuscript.
